# Supplementary material for: Film based on magnesium impregnated biochar/cellulose acetate for phosphorus adsorption from aqueous solution
Source: Royal Society of Chemistry journal article supplement (doi:10.1039/c8ra06655h), 2019-01-01
Supplement: c8ra06655h1.pdf [file c8ra06655h1.pdf]

**SUPPLEMENTARY MATERIAL**

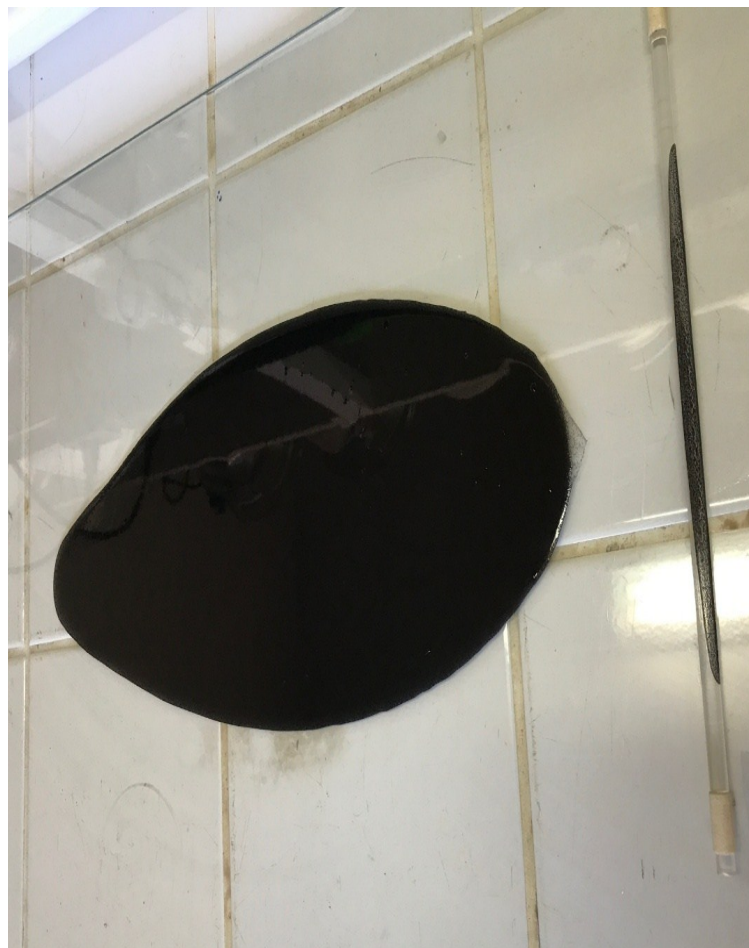

Fig. S1 Filmogenic solution of cellulose acetate and biochar applied on glass, in acetone drying process.

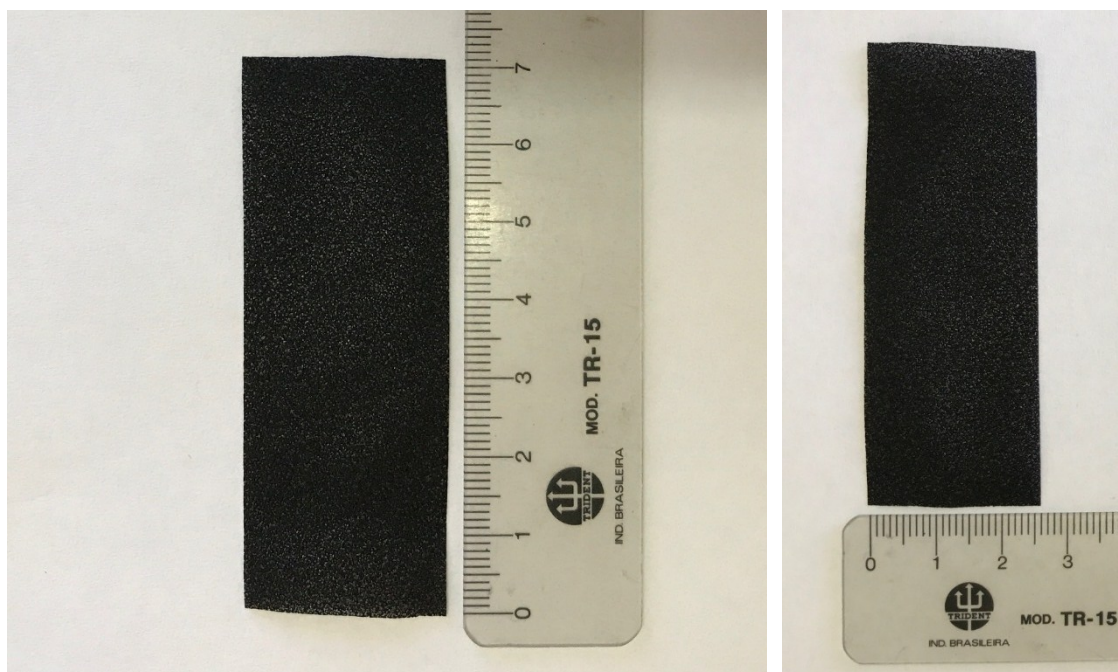

Fig. S2 Hybrid film of cellulose acetate and dried biochar and cut to size 7.0 x 2.5 cm, for use in adsorption studies.

**Table S1** Thickness, weight, density, degree of swelling (*GI*), and solubility in FAC and FAC-B H<sub>2</sub>O (*S*<sub>H<sub>2</sub>O</sub>)

| Film  | Thickness<br>( $\mu\text{m}$ ) | Weight<br>( $\text{g m}^{-2}$ ) | Density<br>( $\text{g cm}^{-3}$ ) | GI<br>(%)      | <i>S</i> <sub>H<sub>2</sub>O</sub><br>(%) |
|-------|--------------------------------|---------------------------------|-----------------------------------|----------------|-------------------------------------------|
| FAC   | $43.4 \pm 2.3$                 | $53.3 \pm 1.7$                  | $1.2 \pm 0.1$                     | $9.1 \pm 1.8$  | $1.4 \pm 0.1$                             |
| FAC-B | $221.0 \pm 12.3$               | $143.1 \pm 7.3$                 | $0.6 \pm 0.1$                     | $27.7 \pm 1.8$ | $33.8 \pm 0.9$                            |

**Table S2** Kinetics of P adsorption parameters

| Model        | Parameter 1                                                   | Parameter 2                                     | R <sup>2</sup> |
|--------------|---------------------------------------------------------------|-------------------------------------------------|----------------|
| First order  | $k_1 = 0.05 \pm 0.01$<br>( $\text{h}^{-1}$ )                  | $q_e = 7.19 \pm 0.29$<br>( $\text{mg g}^{-1}$ ) | 0.98           |
| Second order | $k_2 = 0.01 \pm 0.01$<br>( $\text{g mg}^{-1} \text{h}^{-1}$ ) | $q_e = 9.30 \pm 0.76$<br>( $\text{mg g}^{-1}$ ) | 0.97           |

**Table S3** Isotherm parameters of P adsorption in the FAC-B

| Model      | Parameter 1                                                      | Parameter 2                                      | R <sup>2</sup> |
|------------|------------------------------------------------------------------|--------------------------------------------------|----------------|
| Langmuir   | $k_L = 0.02 \pm 0.01$<br>( $\text{L mg}^{-1}$ )                  | $q_e = 21.57 \pm 1.92$<br>( $\text{mg g}^{-1}$ ) | 0.97           |
| Freundlich | $k_f = 1.13 \pm 0.34$<br>( $\text{mg}^{(1-n)} \text{L g}^{-1}$ ) | $n = 1.94 \pm 0.26$                              | 0.91           |

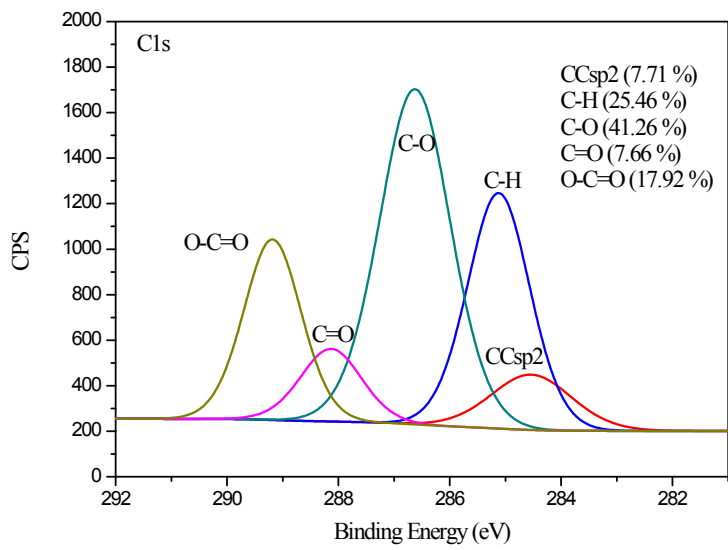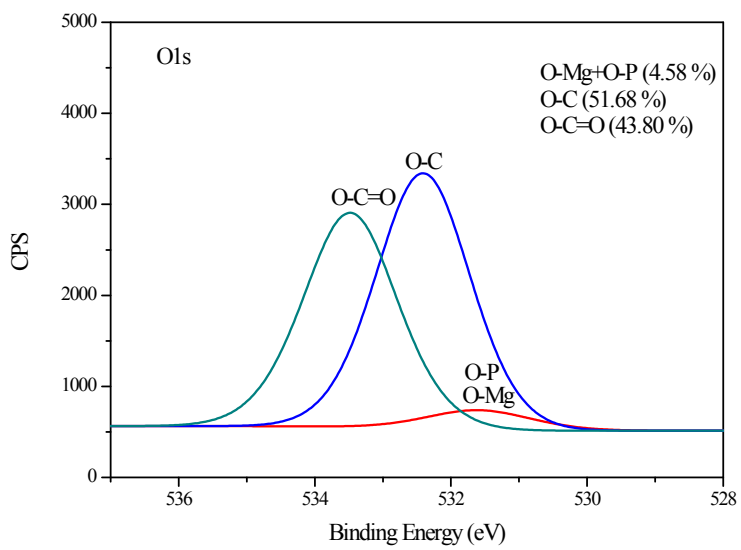

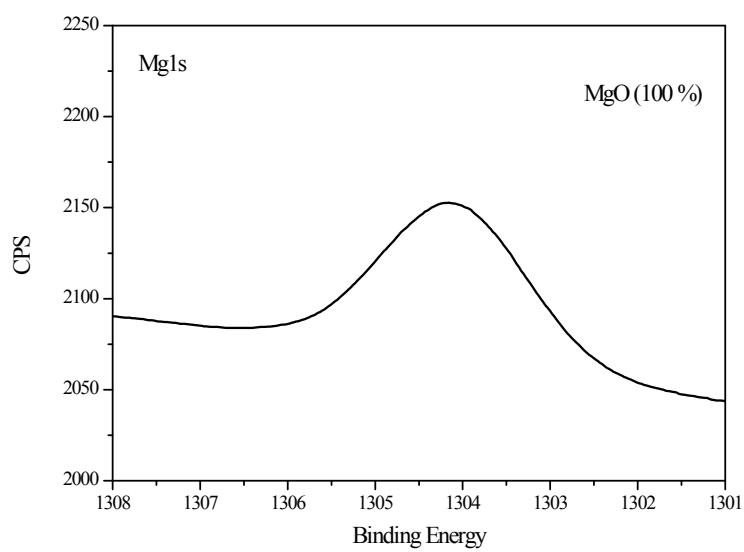

**Fig. S3** Carbon, Oxygen, and Magnesium XPS spectrum of FAC-B after phosphorus adsorption.
